# Supplementary material
Source: MDPI journal article supplement (https://www.mdpi.com/2073-4441/13/2/223)
Supplement: s1 [file s1]

**Table 2.** Correlation coefficients of the selected metrics for the highly humic lake multimetric index.

|                                 | [%] littoral | [%] littoral + [%] profundal | [%] profundal | Abundance [ind/m <sup>2</sup> ] | BMWP Score | Coleoptera (taxa) | ETCO (Eph., Tri., Col., Odo.) | Number of Families | Number of Genera | Number of Taxa |
|---------------------------------|--------------|------------------------------|---------------|---------------------------------|------------|-------------------|-------------------------------|--------------------|------------------|----------------|
| [%] littoral                    | 1.00         | 0.9214                       | 0.246         | -0.49877                        | 0.052      | -0.1463           | -0.18353                      | -0.0301            | -0.12309         | -0.1148        |
| [%] littoral + profundal        | 0.9214       | 1.0000                       | 0.540         | -0.3648                         | -0.065     | -0.2261           | -0.26985                      | -0.0570            | -0.17053         | -0.1575        |
| [%] profundal                   | 0.2459       | 0.5403                       | 1.000         | 0.0386                          | -0.335     | -0.3419           | -0.29079                      | -0.0719            | -0.16989         | -0.1423        |
| Abundance [ind/m <sup>2</sup> ] | -0.4988      | -0.3648                      | 0.039         | 1.0000                          | 0.257      | 0.4029            | 0.41404                       | 0.3897             | 0.44929          | 0.4617         |
| BMWP Score                      | 0.0521       | -0.0646                      | -0.335        | 0.2569                          | 1.000      | 0.5469            | 0.78925                       | 0.7963             | 0.79827          | 0.7526         |
| Coleoptera (taxa)               | -0.1463      | -0.2261                      | -0.342        | 0.4029                          | 0.547      | 1.0000            | 0.59071                       | 0.5223             | 0.62520          | 0.6214         |
| ETCO (Eph., Tri., Col., Odo.)   | -0.1835      | -0.2699                      | -0.291        | 0.4140                          | 0.789      | 0.5907            | 1.00000                       | 0.7577             | 0.85040          | 0.8570         |
| Number of Families              | -0.0300      | -0.0570                      | -0.072        | 0.3897                          | 0.796      | 0.5223            | 0.75772                       | 1.0000             | 0.95315          | 0.9342         |
| Number of Genera                | -0.1231      | -0.1705                      | -0.170        | 0.4493                          | 0.798      | 0.6252            | 0.85040                       | 0.9532             | 1.00000          | 0.9832         |
| Number of Taxa                  | -0.1148      | -0.1575                      | -0.142        | 0.4617                          | 0.753      | 0.6214            | 0.85701                       | 0.9342             | 0.98324          | 1.0000         |
