# Supplementary material
Source: MDPI journal article supplement (https://www.mdpi.com/2073-4441/13/2/223)
Supplement: s1 [file s1]

**Table 3.** Anchor values of the macroinvertebrate metrics for a potential multimetric index for the highly humic lake quality assessment.

| Metric                          | P5       | P10      | P80      | P90      | P95      |
|---------------------------------|----------|----------|----------|----------|----------|
| [%] littoral                    | 9,03880  | 10,3159  | 30,9892  | 37,9660  | 47,8739  |
| [%] littoral + profundal        | 15,79485 | 18,1309  | 46,4258  | 51,5846  | 55,5171  |
| [%] profundal                   | 1,65480  | 3,4518   | 17,7772  | 19,2807  | 20,7579  |
| Abundance [ind/m <sup>2</sup> ] | 89,65000 | 118,1000 | 501,4000 | 608,2000 | 753,8000 |
| BMWP Score                      | 19,40000 | 28,5000  | 64,0000  | 67,0000  | 71,0000  |
| Coleoptera (taxa)               | 0,00000  | 0,0000   | 2,0000   | 3,0000   | 4,4500   |
| ETCO (Eph., Tri., Col., Odo.)   | 2,00000  | 4,0000   | 8,0000   | 9,9000   | 11,9000  |
| Number of Families              | 6,55000  | 8,0000   | 14,0000  | 14,9000  | 15,0000  |
| Number of Genera                | 6,55000  | 8,0000   | 15,8000  | 17,0000  | 19,0000  |
| Number of Taxa                  | 7,10000  | 9,0000   | 16,0000  | 18,0000  | 19,4500  |
