# Supplementary material
Source: MDPI journal article supplement (https://www.mdpi.com/2073-4441/13/2/223)
Supplement: s1 [file s1]

**Table 4.** Macroinvertebrate taxa found in the studied highly humic lakes.

| Higher taxon | TAXON                           | Cenas Mire 1 | Cenas Mire 2 | Cenas Mire 3 | Cenas Mire 4 | Cenas Mire 5 | Melnais Lake Mire 1 | Melnais Lake Mire 2 | Melnais Lake Mire 3 | Melnais Lake Mire 4 | Melnais Lake Mire 5 | L. Orlovas | L. Deguma | L. Piesaista | L. Ramatas Lielezers | L. Soku |
|--------------|---------------------------------|--------------|--------------|--------------|--------------|--------------|---------------------|---------------------|---------------------|---------------------|---------------------|------------|-----------|--------------|----------------------|---------|
| Diptera      | Dolichopodidae                  |              |              |              |              |              |                     |                     |                     |                     |                     |            |           |              | x                    |         |
| Diptera      | Ceratopogonidae                 | x            | x            | x            | x            | x            | x                   | x                   | x                   | x                   | x                   | x          | x         | x            | x                    |         |
| Diptera      | Chironomidae                    | x            | x            | x            | x            | x            | x                   | x                   | x                   | x                   | x                   | x          | x         | x            | x                    | x       |
| Diptera      | <i>Chaoborus crystallinus</i>   | x            | x            | x            | x            | x            | x                   | x                   | x                   | x                   | x                   |            |           |              |                      |         |
| Diptera      | <i>Chaoborus flavicans</i>      |              |              |              |              |              |                     |                     |                     |                     |                     | x          |           |              |                      |         |
| Diptera      | <i>Chaoborus obscuripes</i>     |              |              |              |              |              |                     |                     |                     |                     |                     | x          |           |              |                      |         |
| Diptera      | Culicidae                       |              |              |              |              |              |                     |                     |                     | x                   |                     |            |           |              |                      |         |
| Diptera      | Dixidae                         |              |              |              |              |              |                     |                     |                     | x                   |                     |            |           |              |                      |         |
| Diptera      | <i>Phalacrocer a replicata</i>  |              |              |              |              |              |                     | x                   | x                   |                     | x                   |            | x         |              |                      |         |
| Diptera      | Limoniidae                      |              |              |              |              |              |                     |                     |                     |                     |                     |            |           |              | x                    |         |
| Coleoptera   | <i>Dytiscus</i> sp. lv.         |              |              |              |              |              |                     |                     |                     |                     |                     |            | x         |              |                      |         |
| Coleoptera   | <i>Bidessus</i> sp. ad.         |              |              |              |              |              |                     |                     |                     | x                   |                     |            |           |              |                      |         |
| Coleoptera   | <i>Suphrodytes dorsalis</i>     |              |              |              |              |              |                     |                     |                     | x                   | x                   |            |           |              |                      |         |
| Coleoptera   | Dytiscidae lv.                  | x            | x            | x            | x            | x            |                     |                     |                     |                     |                     |            |           |              |                      |         |
| Coleoptera   | Dytiscidae ad.                  |              | x            |              |              |              |                     |                     |                     |                     |                     |            |           |              |                      |         |
| Coleoptera   | <i>Acilius sulcatus</i> ad.     |              |              |              |              |              |                     | x                   |                     |                     |                     |            |           |              |                      |         |
| Coleoptera   | <i>Acilius sulcatus</i> lv.     |              | x            |              | x            |              | x                   |                     | x                   | x                   |                     |            |           |              |                      |         |
| Coleoptera   | <i>Acilius canaliculatus</i>    |              |              |              |              |              |                     |                     |                     |                     |                     |            |           |              |                      | x       |
| Coleoptera   | Colymbetinae                    |              |              |              |              |              |                     |                     |                     |                     |                     | x          | x         |              |                      |         |
| Coleoptera   | <i>Hydroporus</i> sp. ad.       |              |              |              |              |              |                     |                     |                     |                     |                     | x          |           |              |                      |         |
| Coleoptera   | <i>Hygrotus</i> sp. ad.         | x            | x            | x            |              |              | x                   |                     |                     | x                   | x                   |            |           |              |                      |         |
| Coleoptera   | <i>Hygrotus inaequalis</i> ad.  |              |              |              |              |              |                     |                     |                     |                     |                     | x          |           |              | x                    | x       |
| Coleoptera   | <i>Hygrotus versicolor</i> ad.  |              |              |              |              |              |                     |                     |                     |                     |                     |            |           | x            | x                    | x       |
| Coleoptera   | <i>Hygrotus quinquelineatus</i> |              |              |              |              |              |                     |                     |                     |                     |                     | x          |           | x            | x                    | x       |
| Coleoptera   | <i>Hyphydrus</i> sp. ad.        |              | x            |              | x            |              |                     |                     |                     |                     |                     |            |           |              |                      | x       |
| Coleoptera   | <i>Ilybius</i> sp. ad.          |              |              |              |              |              |                     |                     |                     |                     |                     |            | x         |              |                      |         |
| Coleoptera   | <i>Ilybius ater</i> ad.         |              |              |              |              |              |                     |                     |                     |                     |                     |            |           |              | x                    |         |
| Coleoptera   | <i>Laccophilus</i> sp. ad.      | x            | x            | x            |              | x            |                     |                     |                     |                     |                     |            |           |              |                      |         |
| Coleoptera   | <i>Noterus crassicornis</i>     |              |              |              |              |              |                     | x                   |                     |                     |                     | x          | x         |              |                      |         |
| Coleoptera   | <i>Platambus</i> sp. lv.        |              |              |              |              |              |                     |                     |                     | x                   |                     |            |           |              |                      |         |
| Coleoptera   | <i>Rhantus</i> sp.              |              |              |              |              |              |                     |                     |                     |                     |                     |            | x         |              |                      |         |
| Coleoptera   | <i>Rhantus frontalis</i>        |              |              |              |              |              |                     |                     |                     |                     |                     |            | x         |              |                      |         |
| Coleoptera   | <i>Berosus</i> sp. ad.          |              |              |              |              |              |                     |                     |                     |                     |                     | x          |           |              |                      |         |
| Coleoptera   | <i>Helochaers</i> sp. ad.       |              |              |              |              |              |                     |                     |                     |                     |                     | x          |           |              |                      |         |
