# Supplementary material
Source: MDPI journal article supplement (https://www.mdpi.com/2073-4441/13/2/223)
Supplement: s1 [file s1]

**Table 1.** The results of the binary logistic regression (BLR). Z and p values of the chosen metrics between natural and altered highly humic lakes.

| Metric                                     | Z values | p values |
|--------------------------------------------|----------|----------|
| Abundance [ind/m <sup>2</sup> ]            | 3.467619 | 0.000525 |
| Number of Taxa                             | 3.160496 | 0.001575 |
| oligo [%]                                  | -0.71326 | 0.475686 |
| beta-meso [%]                              | -0.83561 | 0.403376 |
| alpha-meso [%]                             | -0.13457 | 0.892955 |
| BMWP Score                                 | 2.83641  | 0.004562 |
| Average score per Taxon                    | 0.9929   | 0.320759 |
| BMWP Score (Spanish version)               | 2.133274 | 0.032902 |
| BMWP Score (Hungarian version)             | 2.866715 | 0.004148 |
| Average score per Taxon (Hungaria version) | 1.025711 | 0.305028 |
| BMWP Score (Czech version)                 | 2.915703 | 0.003549 |
| Average score per Taxon (Czech version)    | 0.470234 | 0.638188 |
| BMWP Score (Polish version)                | 1.506363 | 0.131974 |
| BMWP Score (Greek version)                 | 3.212641 | 0.001315 |
| IBE Aqem                                   | 0.857425 | 0.39121  |
| Quality Class                              | -1.06727 | 0.28585  |
| Diversity (Simpson-Index)                  | 1.996385 | 0.045892 |
| Diversity (Shannon-Wiener-Index)           | 1.71877  | 0.085656 |
| Diversity (Margalef Index)                 | 2.176288 | 0.029534 |
| Evenness                                   | 0.59473  | 0.552024 |
| Acid Index (Hendrikson & Medin)            | 2.528142 | 0.011467 |
| Abundance of scored taxa/all taxa [%]      | -2.09278 | 0.036368 |
| r-Dominance                                | -1.64036 | 0.100931 |
| r/K relationship                           | -3.23775 | 0.001205 |
| Portuguese Index                           | -0.62895 | 0.52938  |
| Number of sensitive taxa (Austria)         | -2.26827 | 0.023313 |
| [%] littoral                               | -3.42525 | 0.000614 |
| [%] profundal                              | -2.8654  | 0.004165 |
| [%] littoral + profundal                   | -3.8105  | 0.000139 |
| [%] littoral (scored taxa = 100%)          | -2.50811 | 0.012138 |
| [%] Type LB                                | -2.65309 | 0.007976 |
| [%] Type LP                                | 0.693813 | 0.487799 |
| [%] Type IN                                | -2.71217 | 0.006684 |
| [%] Type Pel                               | -1.80686 | 0.070783 |
| [%] Type Arg                               | 0.987216 | 0.323537 |
| [%] Type Psa                               | -1.01269 | 0.311206 |
| [%] Type Aka                               | -0.61794 | 0.536615 |
| [%] Type Lit                               | 0.943553 | 0.345398 |
| [%] Type Phy                               | -1.81857 | 0.068978 |
| [%] Type Pom                               | -0.30942 | 0.757004 |
| [%] Type Oth                               | -3.35499 | 0.000794 |
| [%] Type Aka + Lit + Psa                   | 0.250928 | 0.80187  |
| [%] Type Pel (scored taxa = 100%)          | 1.416779 | 0.156548 |
| [%] Type Psa (scored taxa = 100%)          | -0.60763 | 0.543434 |
| [%] Type Aka (scored taxa = 100%)          | -0.35089 | 0.72567  |
| [%] Type Lit (scored taxa = 100%)          | 1.364048 | 0.172552 |
| [%] Type Phy (scored taxa = 100%)          | -0.15615 | 0.875914 |
| [%] Type Aka+Lit+Psa (scored taxa = 100%)  | 0.787837 | 0.430792 |

|                                                                |          |          |
|----------------------------------------------------------------|----------|----------|
| [%] Grazers and scrapers                                       | -1.94809 | 0.051405 |
| [%] Miners                                                     | -1.33815 | 0.180848 |
| [%] Shredders                                                  | -0.82605 | 0.408774 |
| [%] Gatherers/Collectors                                       | -1.4564  | 0.145283 |
| [%] Active filter feeders                                      | -1.64153 | 0.100687 |
| [%] Passive filter feeders                                     | 1.502277 | 0.133026 |
| [%] Predators                                                  | -2.04438 | 0.040916 |
| [%] Parasites                                                  | -0.91669 | 0.359303 |
| [%] (Grazers + Scrapers)/(GatherersCollectors + FilterFeeders) | 0.292252 | 0.770094 |
| [%] Xyloph. + Shred. + ActFiltFee. + PasFiltFee                | -2.32834 | 0.019894 |
| [%] Shredders (scored taxa = 100%)                             | -0.78527 | 0.432293 |
| [%] Gatherers/Collectors (scored taxa = 100%)                  | -0.3281  | 0.742838 |
| [%] swimming/skating                                           | -2.09836 | 0.035873 |
| [%] swimming/diving                                            | -2.83444 | 0.004591 |
| [%] burrowing/boring                                           | 0.531858 | 0.594824 |
| [%] sprawling/walking                                          | -1.20503 | 0.228193 |
| [%] (semi)sessil                                               | -1.40267 | 0.160717 |
| [%] others (e.g. climbing)                                     | -1.63439 | 0.102177 |
| Turbellaria [%]                                                | -0.01072 | 0.991445 |
| Nematoda [%]                                                   | 0.964519 | 0.334786 |
| Oligochaeta [%]                                                | -0.981   | 0.326595 |
| Hirudinea [%]                                                  | 0.010722 | 0.991445 |
| Crustacea [%]                                                  | 0.567776 | 0.570187 |
| Araneae [%]                                                    | 0.381458 | 0.702863 |
| Ephemeroptera [%]                                              | -0.73825 | 0.460364 |
| Odonata [%]                                                    | 1.633283 | 0.10241  |
| Heteroptera [%]                                                | 1.797366 | 0.072278 |
| Trichoptera [%]                                                | 0.600282 | 0.548318 |
| Coleoptera [%]                                                 | 3.514217 | 0.000441 |
| Diptera [%]                                                    | -2.75817 | 0.005813 |
| Hydrachnidia [%]                                               | 0.038264 | 0.969477 |
| EPT-Taxa [%]                                                   | -0.36676 | 0.713796 |
| EP [%]                                                         | -0.73825 | 0.460364 |
| EPind/Totind [%]                                               | -0.73825 | 0.460364 |
| EPT [%] (abundance classes)                                    | 0.069861 | 0.944305 |
| hololimnic [%]                                                 | 0.149505 | 0.881156 |
| Turbellaria (taxa)                                             | -0.01072 | 0.991445 |
| Nematoda (taxa)                                                | 1.372566 | 0.169887 |
| Oligochaeta (taxa)                                             | -0.2955  | 0.767613 |
| Hirudinea (taxa)                                               | 0.010722 | 0.991445 |
| Crustacea (taxa)                                               | 1.007915 | 0.313495 |
| Araneae (taxa)                                                 | 1.191963 | 0.233276 |
| Ephemeroptera (taxa)                                           | -1.02523 | 0.305254 |
| Odonata (taxa)                                                 | 2.436645 | 0.014824 |
| Heteroptera (taxa)                                             | 2.532416 | 0.011328 |
| Trichoptera (taxa)                                             | 2.210379 | 0.027079 |
| Coleoptera (taxa)                                              | 2.68112  | 0.007338 |
| Diptera (taxa)                                                 | -1.27435 | 0.20254  |
| Hydrachnidia (taxa)                                            | -0.6213  | 0.534403 |
| EPT-Taxa                                                       | 1.550191 | 0.121096 |
| EPT/Diptera                                                    | 0.483935 | 0.628432 |
| OD-Taxa [%] (Austria)                                          | -3.0095  | 0.002617 |
| EPT-Taxa [%] (Austria)                                         | 0.441546 | 0.658818 |

|                               |          |          |
|-------------------------------|----------|----------|
| OD/Total-Taxa                 | -3.0095  | 0.002617 |
| EP-Taxa                       | -1.02523 | 0.305254 |
| ETCO (Eph., Tri., Col., Odo.) | 3.134943 | 0.001719 |
| Turbellaria                   | -0.01072 | 0.991445 |
| Nematoda                      | 1.346312 | 0.178202 |
| Oligochaeta                   | -0.24456 | 0.806797 |
| Hirudinea                     | 0.010722 | 0.991445 |
| Crustacea                     | 1.169243 | 0.242306 |
| Araneae                       | 1.052331 | 0.292648 |
| Ephemeroptera                 | 0.079969 | 0.936262 |
| Odonata                       | 2.740215 | 0.00614  |
| Heteroptera                   | 2.532835 | 0.011314 |
| Trichoptera                   | 1.534736 | 0.124849 |
| Coleoptera                    | 2.727836 | 0.006375 |
| Diptera                       | 1.516859 | 0.129302 |
| Hydrachnidia                  | 1.347248 | 0.1779   |
| Number of Families            | 2.777762 | 0.005473 |
| Number of Genera              | 3.265076 | 0.001094 |
| Trichoptera_taxa              | 2.210379 | 0.027079 |
| Leptophlebiidae               | 0.072161 | 0.942474 |
| DIPTERA_Bad_SIPH_G            | -1.33431 | 0.182103 |
| HABITAT_Argillal              | 1.029502 | 0.303244 |
| TROPHIC_Filterer              | 0.395225 | 0.692677 |
| BEHAV_Borrowing               | 0.517424 | 0.60486  |
| Sel_nonEPTaxa_M               | -0.8111  | 0.417308 |
| ALL/Diptera                   | -0.06047 | 0.951779 |
| Sel_Trichoptera               | 1.118903 | 0.263182 |
| PleTri_taxa                   | 2.210379 | 0.027079 |
| Life Index                    | -2.93604 | 0.003324 |
| Portuges GoldIndex            | 2.899345 | 0.003739 |
| sel EPTD                      | 0.328716 | 0.74237  |
| AWIC Index                    | -1.09699 | 0.272645 |
| Sum of abundance classes      | 0.255947 | 0.797991 |
| Number of indicator taxa      | 0.088573 | 0.929421 |
| SPEAR pesticides              | -1.75495 | 0.079267 |
| SPEAR organic                 | -2.39511 | 0.016615 |
| SPEAR [%]                     | -0.62221 | 0.533801 |
| Anzahl Indikatorarten         | 3.160496 | 0.001575 |
